# Supplementary material
Source: HighWire-hosted journal article supplement (https://aacrjournals.org/crawlprevention/governor?content=%2fNotFound%3f404%3bhttp%3a%2f%2faacrjournals.org%3a80%2fhighwire%2ffilestream%2f36836%2ffield_highwire_adjunct_files%2f5%2f148823_1_supp_3169183_nvkqqy.pdf)
Supplement: governor [file governor]

Validate User


We are sorry, but we are experiencing unusual traffic at this time. Please help us confirm that you are not a robot and we will take you to your content.

Could not validate captcha. Please try again.

Take me to my Content
